# Supplementary material
Source: PubMed Central journal article supplement (PMC4908191)
Supplement: mmc1.pdf [file mmc1.pdf]

## Supplemental Data

### Mutations in *GANAB*, Encoding the Glucosidase II $\alpha$

### Subunit, Cause Autosomal-Dominant Polycystic Kidney and Liver Disease

Binu Porath, Vladimir G. Gainullin, Emilie Cornec-Le Gall, Elizabeth K. Dillinger, Christina M. Heyer, Katharina Hopp, Marie E. Edwards, Charles D. Madsen, Sarah R. Mauritz, Carly J. Banks, Saurabh Baheti, Bharathi Reddy, José Ignacio Herrero, Jesús M. Bañales, Marie C. Hogan, Velibor Tasic, Terry J. Watnick, Arlene B. Chapman, Cécile Vigneau, Frédéric Lavainne, Marie-Pierre Audrézet, Claude Ferec, Yannick Le Meur, Vicente E. Torres, Genkyst Study Group, HALT Progression of Polycystic Kidney Disease Group, Consortium for Radiologic Imaging Studies of Polycystic Kidney Disease, and Peter C. Harris

**SUPPLEMENTAL FIGURES**

**Figure S1**

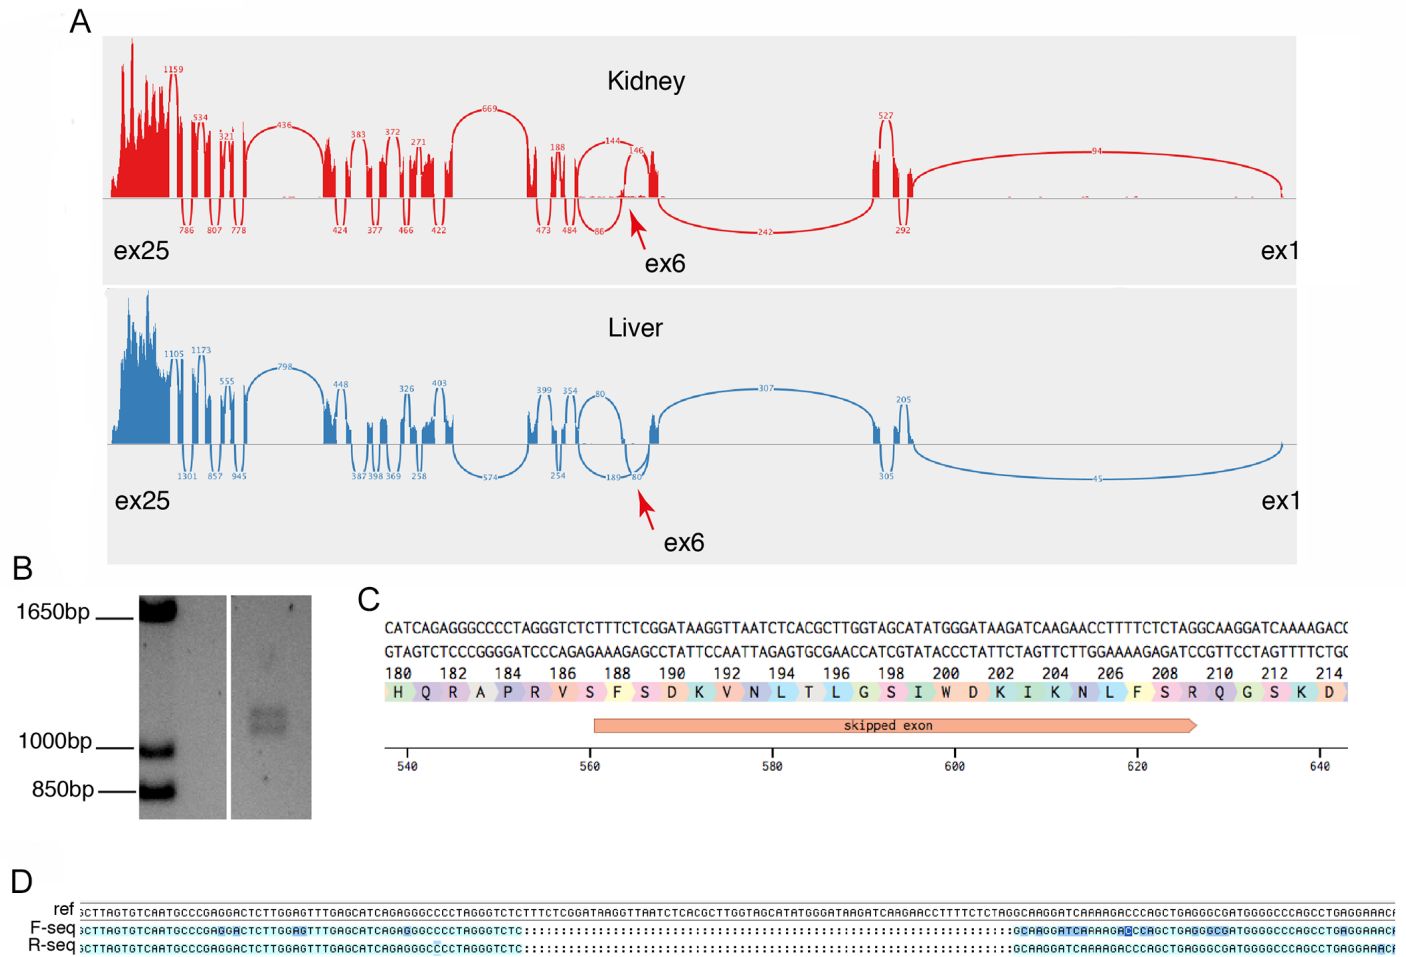

**Figure S1: Analysis of *GANAB* isoforms.** (A) Sashimi plots summarizing the results of the Illumina BodyMap 2.0 RNAseq data set (ENA archive: ERP000546) for *GANAB* mRNA expression in human liver and kidney tissue visualized using Integrated Genome Viewer (IGV, Broad Institute; 45 read threshold). Note in both liver and kidney the splice forms with (Isoform 3; NM\_198335) and without exon 6 (Isoform 2; NM\_198334) are approximately equally represented. (B) RT-PCR of RCTE cells showing two distinct products with primers flanking exon 6, which are confirmed by sequencing to be isoforms 3 and 2 (D). (C) Diagram showing the inframe exon 6 region (66bp, 22aa) skipped in isoform 2.

Figure S2

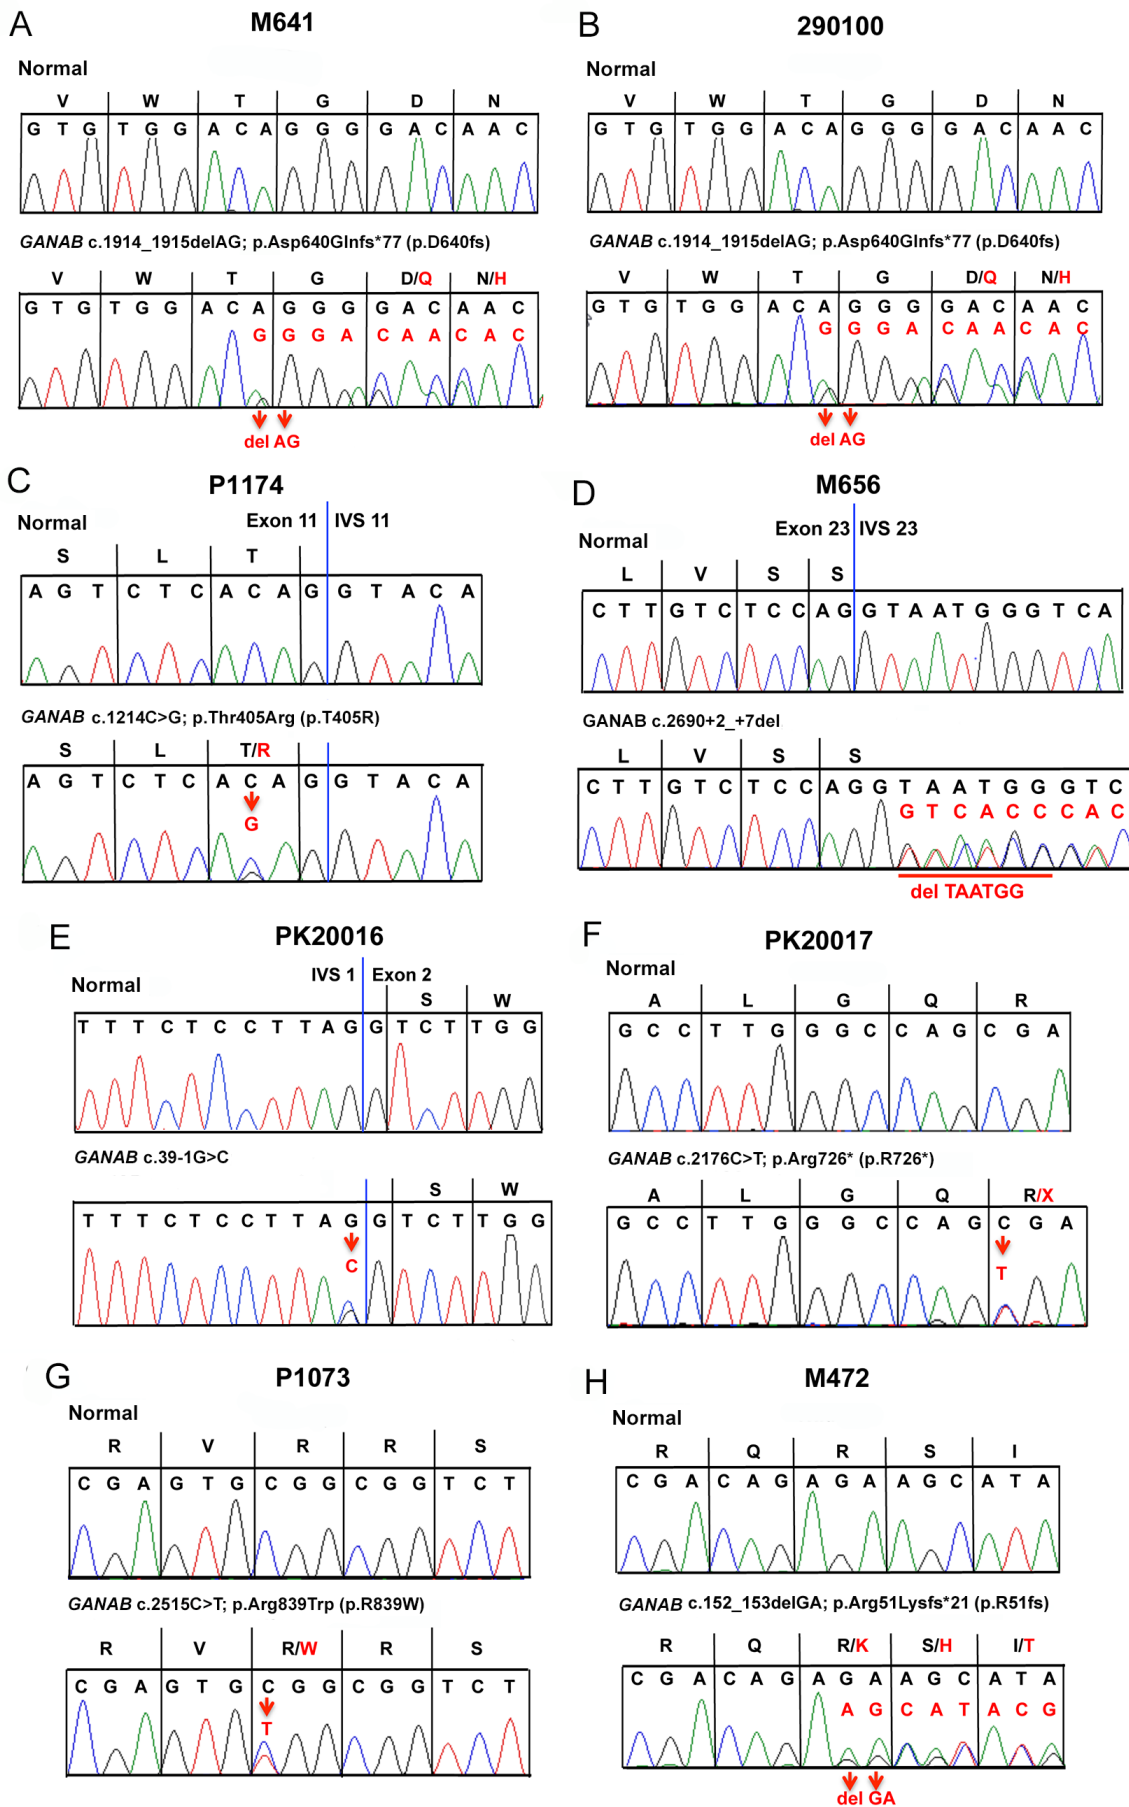

**Figure S2: Sequence of *GANAB* mutations detected by Sanger sequencing in eight families.** (A) M641, c.1914\_1915delAG; p.Asp640Glnfs\*77 (p.D640fs), (B) 290100, c.1914\_1915delAG; p.Asp640Glnfs\*77 (p.D640fs), (C) P1174, c.1214C>G; pThr405Arg (p.T405R), (D) M656, c2690+2\_+7del, (E) PK20016, c.39-1G>C, (F) PK20017, c.2176C>T; p.Arg726\* (p.R726\*), (G) P1073, c.2515C>T; p.Arg839Trp (p.R839W), (H) M472, c.152\_153delGA; p.Arg51Lysfs\*21 (p.R51fs). Each component figure shows the sequence of the specific *GANAB* variant indicated in red (bottom panel), compared to the normal sequence (top panel). Note that the deletion in M656 disrupts the canonical donor site. The substitution in P1174 is close to end of exon 11 but is not predicted to alter splicing.



**Figure S3**

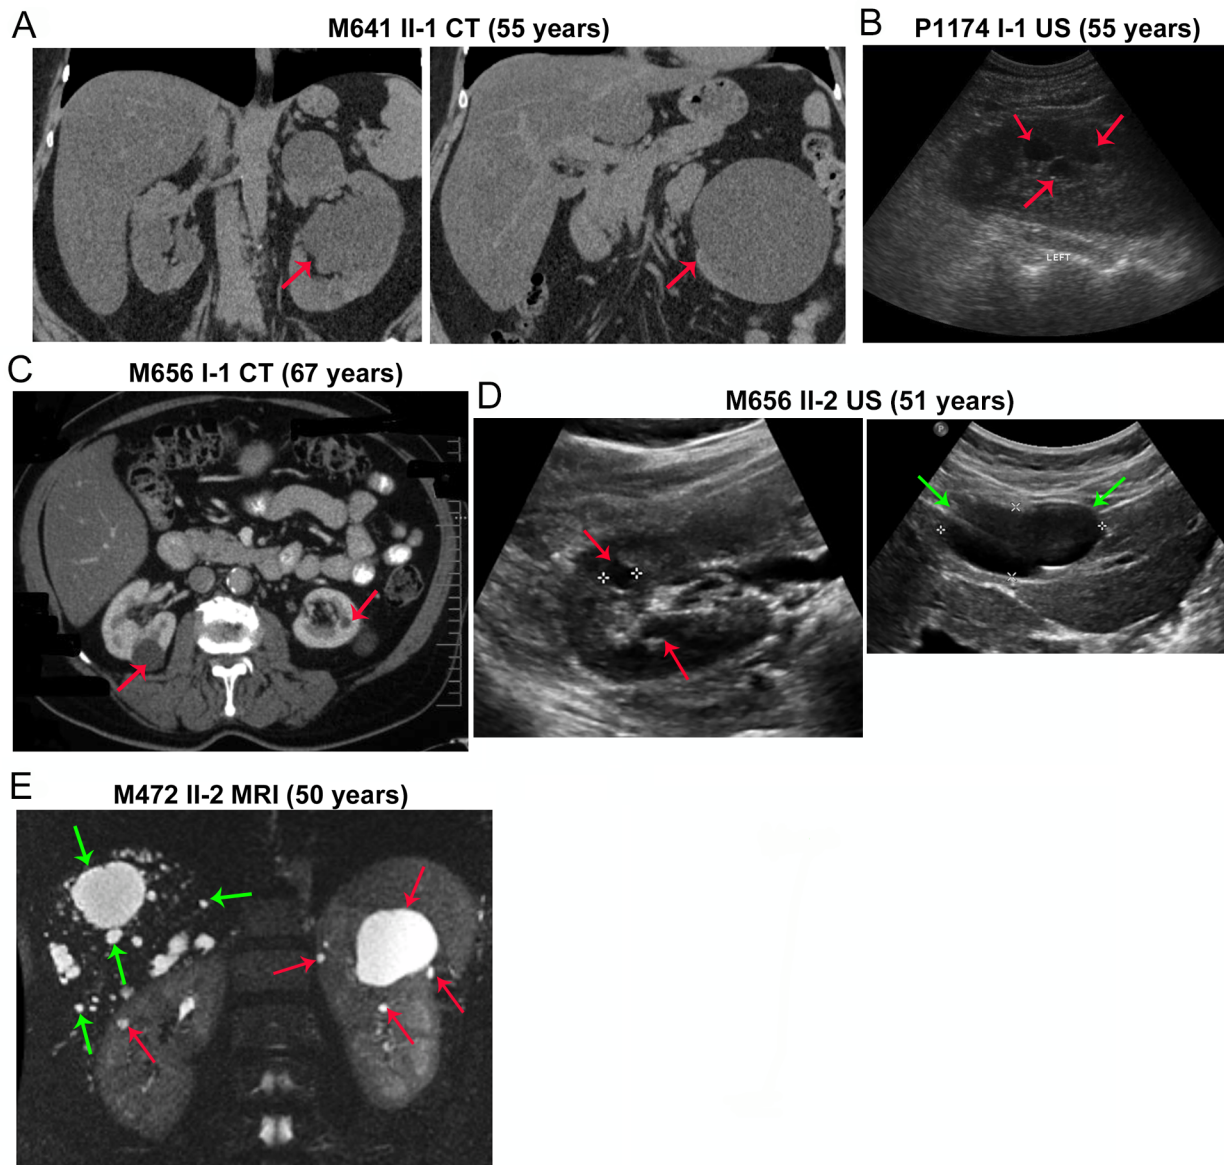

**Figure S3: Kidney and liver images from affected members of families with *GANAB* mutations.** Kidney and liver cysts are indicated with red or green arrows, respectively. Just representative cysts are highlighted where multiple cysts are present. (A) CT scan without contrast of kidneys and liver from M641, II-1 at 55y showing several kidney cysts, including a large one causing organ enlargement. Liver cysts are not evident in this image without contrast and organ enlargement may be due to fatty infiltrate (Table 1). (B) US image of kidneys from P1174, I-1 at 55y showing three moderately sized cysts. (C) CT scan image with contrast from M656, I-1 at 67y showing a few kidney cysts, but no apparent liver cysts. (D) Ultrasound of M656, II-2 at 51y showing a few renal cysts (left) and two large liver cysts (right). (E) T2-weighted MRI images from M472, II-2 at 50y showing a few renal cysts and multiple scattered liver cysts.

**Figure S4**

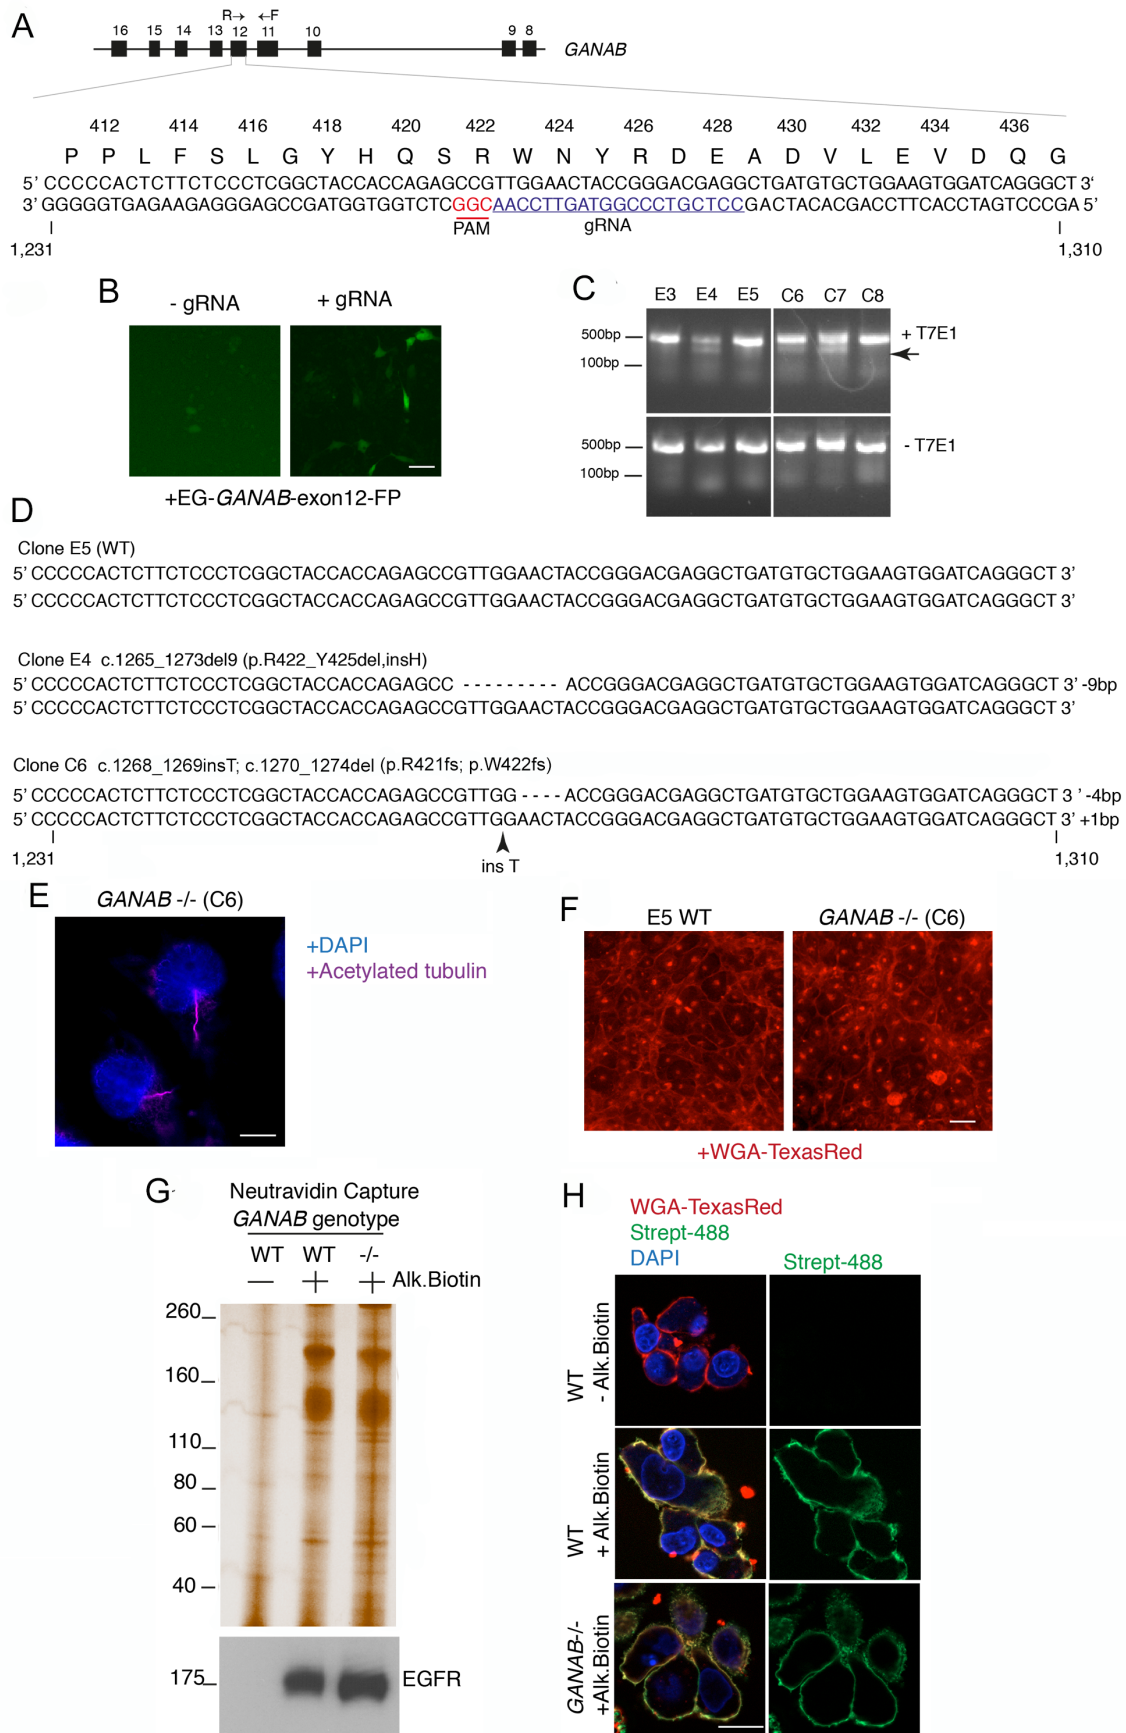

**Figure S4: Generation and characterization of RCTE cells with targeted *GANAB* deletion using the CRISPR/Cas9 system.** (A) Diagram of *GANAB* showing the targeted region and sequence plus the position of the employed gRNA and protospacer adjacent motif (PAM). (B) Testing of the *GANAB* exon 12 gRNA using targeted sequence flanked by two halves of EGFP (EGxxFP)<sup>1</sup>, EG-*GANAB*\_exon12-FP. Cas9/gRNA co-transfected with EG-*GANAB*\_exon12-FP in RCTE cells promotes recombination and EGFP fluorescence in transfected cells (Bar = 100µm). (C) PCR of a 550bp genomic region including *GANAB* exon 12 showing digestion due to mismatched sequence in clones E4, C6 and C7 (arrow) following T7E1 treatment. (D) DNA sequencing showing the inframe deletion in clone E4 and biallelic, frameshifting mutations in clone C6. (E) Confluent *GANAB*<sup>-/-</sup> RCTE cells detected with acetylated α-tubulin and stained with DAPI showing that they form normal cilia. Bar = 10µm. (F) Wheat Germ Agglutinin (WGA), which reacts with mature surface sugars, staining of WT and *GANAB*<sup>-/-</sup> RCTE clones shows similar staining, indicating no gross terminal glycosylation defects. (G) Biotinylation of terminally processed sialylated sugars with alkoxyamine biotin (Alk. Biotin) and neutravidin capture followed by silver staining showing similar surface glycoprotein detection in WT and *GANAB*<sup>-/-</sup> RCTE cells. (H) Cells employed for neutravidin capture (G), detected with WGA and streptavidin-488 to confirm surface glycoprotein labeling specificity. Scale bar = 20µm.

**Figure S5**

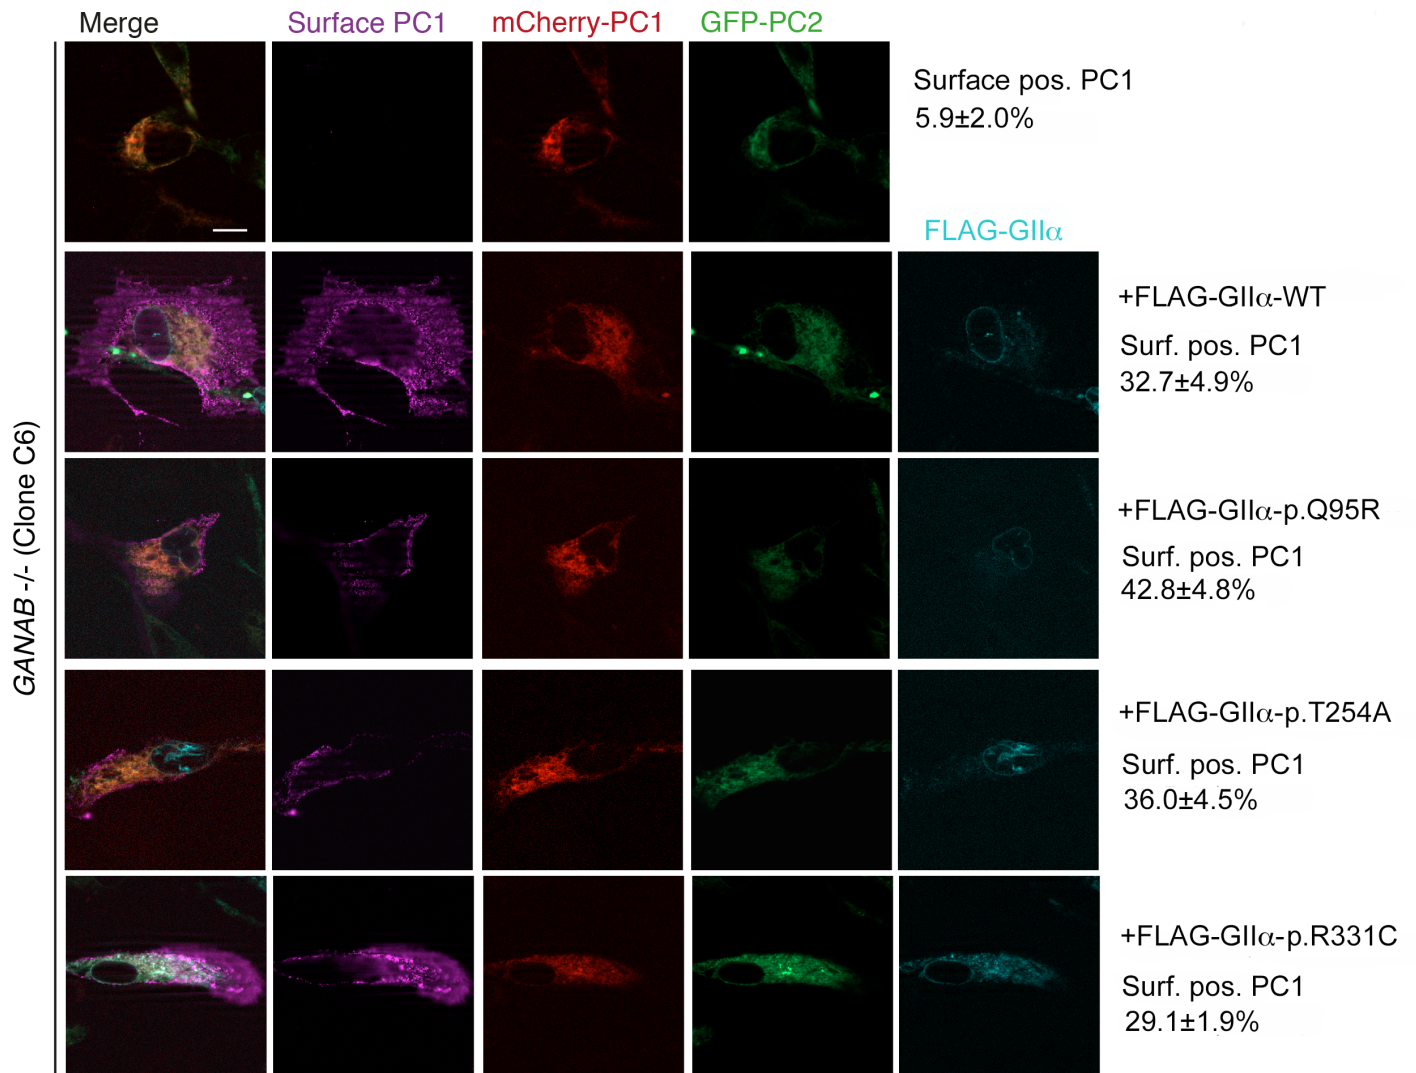

**Figure S5: Surface localization of PC1 tested in *GANAB*<sup>-/-</sup> cells transfected with *GII $\alpha$*  variants.** Three *GANAB* missense variants either poorly predicted to be pathogenic from bioinformatics analysis (p.Gln95Arg [p.Q95R] and p.Thr254Ala [p.T254A]) or that are commonly found in the ExAC server (p.Arg331Cys [p.R331C]) were assayed for surface localization of PC1. *GANAB*<sup>-/-</sup> RCTE cells were co-transfected with mCherry-PC1 and GFP-PC2 as well as FLAG tagged *GII $\alpha$*  plasmids that are WT (+FLAG-*GII $\alpha$* -WT) or contain the variants and examined for live-cell surface mCherry-PC1. In triple transfected *GANAB*<sup>-/-</sup> cells, p.Gln95Arg (p.Q95R; P=0.1), p.Thr254Ala (p.T254A; P=0.6), and p.Arg331Cys (p.R331C; P=0.5) were not significantly different from WT in their able to rescue PC1 surface localization, indicating that they are likely neutral variants. Students T-test was performed to determine significance in at least 100 triple-transfected cells analyzed between three independent experiments. Scale bar=20 $\mu$ m.

**Table S1:** Identified possible pathogenic variants detected by whole exome sequencing

| Family <sup>1</sup> | Chr.                  | Position        | Gene         | Transcript       | Exon      | HGVS Coding         | HGVS Protein   | #Passed Filters <sup>2</sup> |
|---------------------|-----------------------|-----------------|--------------|------------------|-----------|---------------------|----------------|------------------------------|
| P75                 | 5                     | 66438330        | MAST4        | NM_001164664     | 21        | c.2699A>C           | p.Q900P        | 5                            |
|                     | 5                     | 131940620       | RAD50        | NM_005732        | 16        | c.2647C>T           | p.R883C        | 5                            |
|                     | 8                     | 25261105        | DOCK5        | NM_024940        | 48        | c.4958G>A           | p.R1653H       | 5                            |
|                     | 11                    | 66328939        | ACTN3        | NM_001104        | 17        | c.2006G>A           | p.R672Q        | 5                            |
|                     | 16                    | 10867236        | TVP23A       | NM_001079512     | 5         | c.387A>G            | p.I129M        | 5                            |
|                     | 19                    | 49364918        | PLEKHA4      | NM_020904        | 4         | c.224G>A            | p.R75H         | 5                            |
| M199                | 4                     | 190876287       | FRG1         | NM_004477        | 5         | c.413G>A            | p.W138*        | 6                            |
|                     | 12                    | 50598436        | LIMA1        | NM_001113546     | 6         | c.763C>T            | p.R255*        | 6                            |
|                     | 12                    | 51773085        | GALNT6       | NM_007210        | 3         | c.481C>T            | p.R161*        | 6                            |
|                     | 14                    | 64676186        | SYNE2        | NM_182914        | 102       | c.18430G>A          | p.D6144N       | 6                            |
|                     | 16                    | 2376215         | ABCA3        | NM_001089        | 5         | c.115C>T            | p.L39F         | 6                            |
|                     | 1                     | 22448067        | WNT4         | NM_030761        | 3         | c.316A>G            | p.T106A        | 5                            |
|                     | 4                     | 190876272       | FRG1         | NM_004477        | 5         | c.398G>A            | p.G133E        | 5                            |
|                     | 6                     | 12161747        | HIVEP1       | NM_002114        | 8         | c.6563A>G           | p.N2188S       | 5                            |
|                     | 12                    | 14927737        | H2AFJ        | NM_177925        | 1         | c.333C>G            | p.N111K        | 5                            |
| M263                | 1                     | 26887275        | RPS6KA1      | NM_001006665     | 14        | c.1301G>A           | p.G434D        | 6                            |
|                     | 2                     | 215798885       | ABCA12       | NM_173076        | 52        | c.7597G>A           | p.A2533T       | 6                            |
|                     | 3                     | 120449574       | RABL3        | NM_173825        | 2         | c.107C>A            | p.S36*         | 6                            |
|                     | 3                     | 128694748       | KIAA1257     | NM_020741        | 7         | c.897-2A>G          | p.W300fs       | 6                            |
|                     | 4                     | 190876287       | FRG1         | NM_004477        | 5         | c.413G>A            | p.W138*        | 6                            |
|                     | 9                     | 35102108        | STOML2       | NM_013442        | 3         | c.267G>T            | p.Q89H         | 6                            |
|                     | <b>11<sup>3</sup></b> | <b>62398260</b> | <b>GANAB</b> | <b>NM_198335</b> | <b>12</b> | <b>c.1265G&gt;T</b> | <b>p.R422L</b> | <b>6</b>                     |
|                     | 11                    | 67377897        | NDUFV1       | NM_007103        | 5         | c.556G>C            | p.A186P        | 6                            |
|                     | 12                    | 106820980       | POLR3B       | NM_018082        | 13        | c.1107A>T           | p.L369F        | 6                            |
|                     | 13                    | 25671369        | PABPC3       | NM_030979        | 1         | c.1033G>T           | p.E345*        | 6                            |
|                     | 15                    | 90934098        | IQGAP1       | NM_003870        | 2         | c.148G>A            | p.A50T         | 6                            |
|                     | 17                    | 21319792        | KCNJ12       | NM_021012        | 3         | c.1138G>A           | p.E380K        | 6                            |
|                     | 19                    | 8322803         | CERS4        | NM_024552        | 10        | c.782G>T            | p.C261F        | 6                            |
|                     | 22                    | 18613671        | TUBA8        | NM_018943        | 5         | c.1118G>A           | p.R373Q        | 6                            |
|                     | 2                     | 152293802       | RIF1         | NM_018151        | 13        | c.1420C>A           | p.H474N        | 5                            |
|                     | 2                     | 233655546       | GIGYF2       | NM_001103147     | 12        | c.917G>C            | p.S306T        | 5                            |
|                     | 3                     | 49761081        | GMPPB        | NM_013334        | 1         | c.79G>C             | p.D27H         | 5                            |
|                     | 4                     | 190876272       | FRG1         | NM_004477        | 5         | c.398G>A            | p.G133E        | 5                            |
|                     | 5                     | 149782705       | CD74         | NM_001025159     | 7         | c.796C>T            | p.R266C        | 5                            |
|                     | 8                     | 144688809       | PYCR1        | NM_023078        | 4         | c.413A>G            | p.N138S        | 5                            |
|                     | 9                     | 101980978       | ALG2         | NM_033087        | 2         | c.489G>C            | p.E163D        | 5                            |
|                     | 10                    | 26446251        | MYO3A        | NM_017433        | 26        | c.2806G>A           | p.D936N        | 5                            |
|                     | 11                    | 1017041         | MUC6         | NM_005961        | 31        | c.5760C>A           | p.Y1920*       | 5                            |
|                     | 11                    | 1477645         | BRSK2        | NM_001256627     | 17        | c.1736G>T           | p.G579V        | 5                            |
|                     | 12                    | 53647451        | MFSD5        | NM_001170790     | 2         | c.1153G>A           | p.G385R        | 5                            |
|                     | 14                    | 23311809        | MMP14        | NM_004995        | 4         | c.571C>A            | p.P191T        | 5                            |
|                     | 14                    | 105613735       | JAG2         | NM_002226        | 20        | c.2407A>T           | p.I803F        | 5                            |
| 17                  | 65944369              | BPTF            | NM_182641    | 23               | c.7873G>A | p.E2625K            | 5              |                              |
| M560                | 1                     | 1572296         | CDK11B       | NM_033487        | 14        | c.995T>A            | p.L332Q        | 6                            |
|                     | 3                     | 1337405         | CNTN6        | NM_014461        | 6         | c.575G>A            | p.G192D        | 6                            |
|                     | 16 <sup>4</sup>       | 2140803         | PKD1         | NM_001009944     | 44        | c.12010C>T          | p.Q4004*       | 6                            |
|                     | 1                     | 236228234       | NID1         | NM_002508        | 1         | c.146G>A            | p.G49E         | 5                            |
|                     | 2                     | 170042319       | LRP2         | NM_004525        | 50        | c.9539C>T           | p.P3180L       | 5                            |



|       |    |           |          |              |     |            |           |   |
|-------|----|-----------|----------|--------------|-----|------------|-----------|---|
|       | 2  | 179431879 | TTN      | NM_001267550 | 326 | c.78980G>A | p.R26327Q | 5 |
|       | 5  | 78977820  | PAPD4    | NM_001114394 | 14  | c.1316C>T  | p.T439I   | 5 |
|       | 13 | 52532497  | ATP7B    | NM_000053    | 8   | c.2305A>G  | p.M769V   | 5 |
|       | 18 | 11889468  | MPPE1    | NM_023075    | 5   | c.412C>T   | p.R138W   | 5 |
|       | 21 | 33711066  | URB1     | NM_014825    | 26  | c.4460C>T  | p.P1487L  | 5 |
|       | 21 | 34889894  | GART     | NM_000819    | 15  | c.1724C>T  | p.P575L   | 5 |
| P907  | 1  | 21903087  | ALPL     | NM_000478    | 11  | c.1262A>G  | p.Y421C   | 6 |
|       | 1  | 24706274  | STPG1    | NM_001199013 | 5   | c.331G>A   | p.A111T   | 6 |
|       | 2  | 170072887 | LRP2     | NM_004525    | 35  | c.5702C>T  | p.A1901V  | 6 |
|       | 7  | 7495725   | COL28A1  | NM_001037763 | 16  | c.1321G>A  | p.G441R   | 6 |
|       | 7  | 141759383 | MGAM     | NM_004668    | 32  | c.3931C>T  | p.R1311W  | 6 |
|       | 11 | 18048098  | TPH1     | NM_004179    | 6   | c.742C>T   | p.R248*   | 6 |
|       | 14 | 102749873 | MOK      | NM_014226    | 2   | c.64C>T    | p.Q22*    | 6 |
|       | 15 | 78882221  | CHRNA5   | NM_000745    | 5   | c.488C>T   | p.P163L   | 6 |
|       | 1  | 43032040  | CCDC30   | NM_001080850 | 6   | c.749G>T   | p.R250L   | 5 |
|       | 1  | 145273300 | NOTCH2NL | NM_203458    | 3   | c.154C>T   | p.R52*    | 5 |
|       | 2  | 172931008 | METAP1D  | NM_199227    | 5   | c.514G>A   | p.G172R   | 5 |
|       | 5  | 33596160  | ADAMTS12 | NM_030955    | 17  | c.2533C>T  | p.R845C   | 5 |
|       | 5  | 140166534 | PCDHA1   | NM_018900    | 1   | c.659C>A   | p.P220Q   | 5 |
|       | 5  | 140222006 | PCDHA8   | NM_018911    | 1   | c.1100C>T  | p.T367I   | 5 |
|       | 11 | 65631296  | MUS81    | NM_025128    | 10  | c.983T>C   | p.L328P   | 5 |
|       | 15 | 34649630  | NUTM1    | NM_001284292 | 8   | c.3421C>T  | p.R1141C  | 5 |
|       | 16 | 23208666  | SCNN1G   | NM_001039    | 6   | c.995A>G   | p.H332R   | 5 |
|       | 17 | 74005483  | EVPL     | NM_001988    | 22  | c.3803G>A  | p.R1268H  | 5 |
|       | 22 | 50886828  | SBF1     | NM_002972    | 38  | c.5197C>T  | p.R1733C  | 5 |
| P1272 | 1  | 93998617  | FNBP1L   | NM_001164473 | 8   | c.778G>A   | p.E260K   | 5 |
|       | 1  | 216166437 | USH2A    | NM_206933    | 35  | c.6730G>A  | p.V2244M  | 5 |
|       | 2  | 190922360 | MSTN     | NM_005259    | 3   | c.752C>T   | p.P251L   | 5 |
|       | 2  | 197706020 | PGAP1    | NM_024989    | 27  | c.2707T>C  | p.Y903H   | 5 |
|       | 3  | 160783259 | PPM1L    | NM_139245    | 3   | c.643G>A   | p.G215R   | 5 |
|       | 5  | 13752253  | DNAH5    | NM_001369    | 64  | c.11018C>T | p.S3673F  | 5 |
|       | 12 | 104144483 | STAB2    | NM_017564    | 60  | c.6565G>A  | p.D2189N  | 5 |
|       | 20 | 54824351  | MC3R     | NM_019888    | 1   | c.452G>A   | p.R151H   | 5 |

1: Details of subjects screened per family

P75 5 members screened: 3 affected siblings, 1 unaffected sibling, and unaffected mother

M199 3 members screened: 3 affected, maternal uncle and 2 nieces

M263 2 members screened: 2 affected, father and daughter

M560 3 members screened: 3 affected, mother and 2 daughters

P907 3 members screened: 2 affected daughters and an unaffected mother

P1272 2 members screened: 2 affected, maternal grandfather and grandchild

2: Only variants listed are those considered likely neutral by  $\leq 1/6$  programs, with the number of programs predicting pathogenicity listed (see Online Methods for details)

3: *GANAB* mutation is bolded

4: *PKD1* mutation missed by Sanger sequencing detected in this family

**Table S2:** Details of CRISPR/Cas9 guide RNA sequences

| <b>Name</b> | <b>DNA Sequence</b>   |
|-------------|-----------------------|
| gRNA1       | TGCCTCATTCTTCTGCTCTT  |
| gRNA2       | CGGCAATATGCTAGTCTCAC  |
| gRNA3       | CCAGAGCCGTTGGA ACTACC |
| gRNA4       | CCTCGTCCCGGTAGTTCCAA  |
| gRNA5       | TGTGATGTCATCTGGCTAGA  |

**Table S3:** Details of primer sequences for generating site directed mutations

| <b>Mutation</b>          | <b>Forward sequence</b>       | <b>Reverse sequence</b> |
|--------------------------|-------------------------------|-------------------------|
| c.284A>G; p.Gly95Arg     | CAGGGGCTTCgAAAGAACATG         | AAGCTCTAGCACCAGCAAC     |
| c.760A>G; p.Thr254Ala    | GACATTCAAAGCTCACTCTGACAGCAAGC | TCCTCCCAGGCTCCTGGC      |
| c.991C>T; p.Arg331Cys    | CAACCCTCATtGCGACTTGGG         | TGTGCCAGGAGCACAGGC      |
| c.1214 C>G; p.Thr405Arg  | GCTAGTCTCAgAGGAACCCAG         | ATATTGCCGGAAAACATCAG    |
| c.1265 G>T; p.Arg422Leu  | CACCAGAGCCtTTGGA ACTAC        | GTAGCCGAGGGAGAAGAG      |
| c. 2515 C>T; p.Arg839Trp | TGCGAGTGtGGCGGTCTTCAG         | TCCATCGAGGCACGATTGT     |

## REFERENCE

1. Mashiko, D. *et al.* Generation of mutant mice by pronuclear injection of circular plasmid expressing Cas9 and single guided RNA. *Sci Rep* **3**, 3355 (2013).
